# Supplementary material
Source: PubMed Central journal article supplement (PMC9401454)
Supplement: 10780432ccr210851-sup-261875_2_supp_7159128_q91f91.pdf [file 10780432ccr210851-sup-261875_2_supp_7159128_q91f91.pdf]

# Supplementary Figure 2

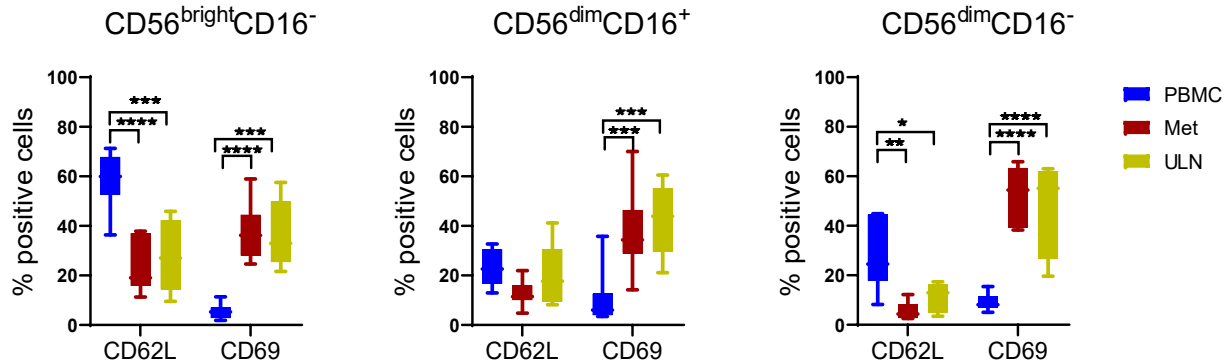

**Supplementary Fig. S2. Infiltrating NK cells exhibit a tissue resident phenotype.** Expression of the tissue resident markers CD62L and CD69 on (A) CD56<sup>bright</sup>, (B) CD56<sup>dim</sup>CD16<sup>+</sup> and (C) CD56<sup>dim</sup>CD16<sup>-</sup> NK cells from PBMC, Met and ULN. Bars represent Min and Max. Two-way ANOVA Test, Mixed effects Model with Turkey post-hoc test. \*p<0.05, \*\*p<0.01, \*\*\*p<0.001, \*\*\*\*p<0.0001. n=11 PBMC, n=11 Met, n=7 ULN.
