# Supplementary material
Source: PubMed Central journal article supplement (PMC9401454)
Supplement: 10780432ccr210851-sup-261875_2_supp_7159129_qk1f91.pdf [file 10780432ccr210851-sup-261875_2_supp_7159129_qk1f91.pdf]

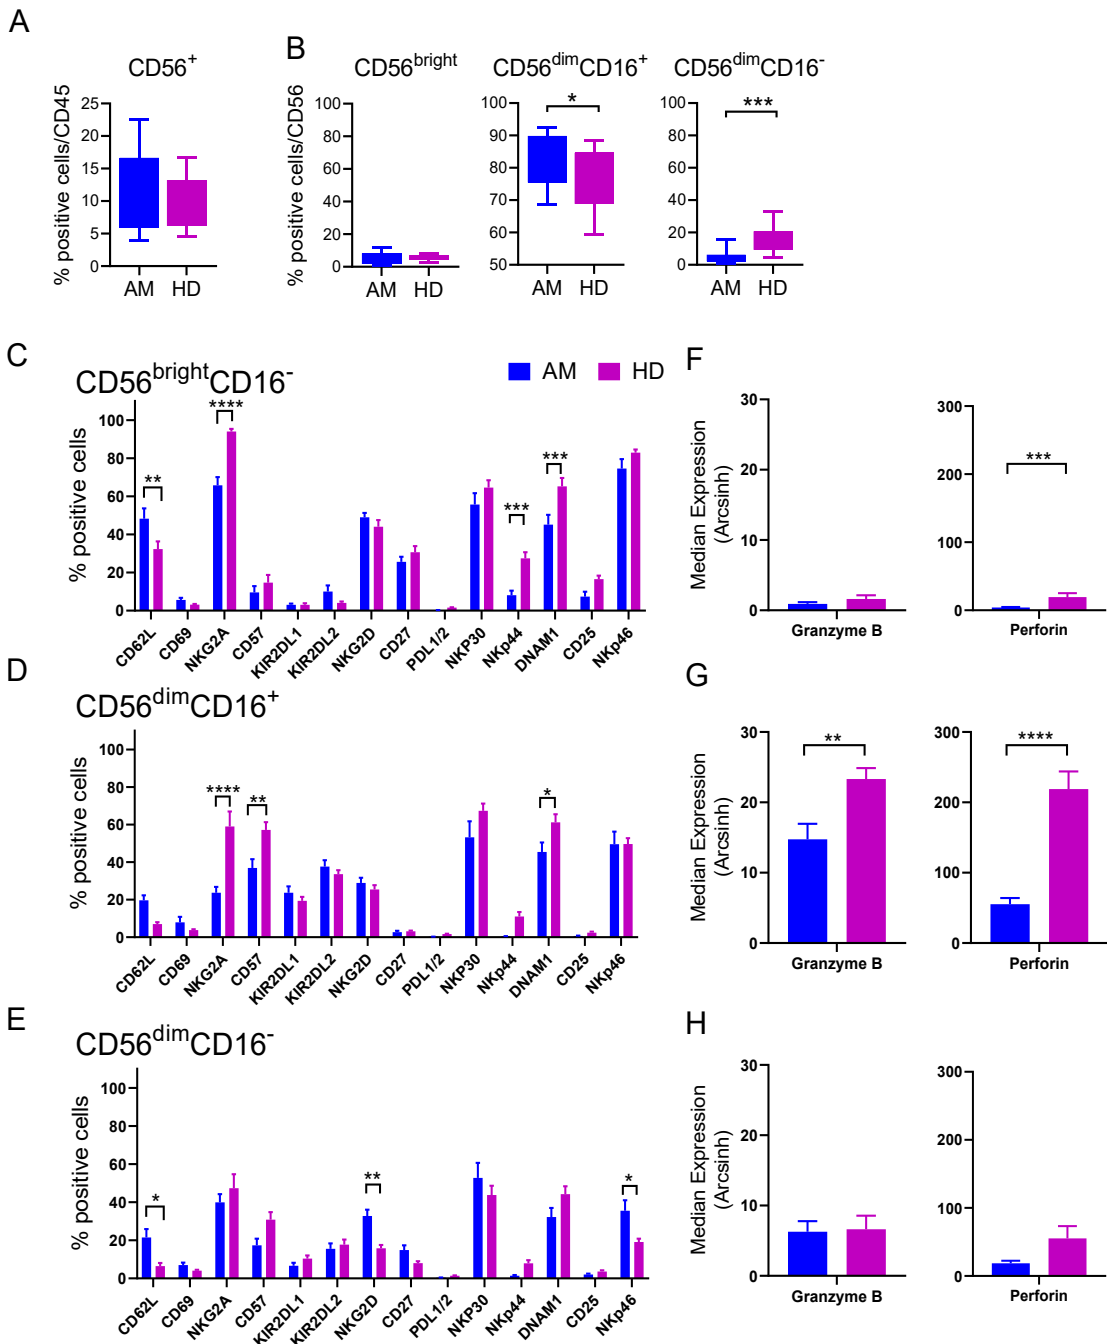

**Supplementary Fig. S3. Phenotypic analysis of blood NK cells from AM patients and healthy donors.** Frequency of circulating (A) NK cells and (B) NK cells subsets from advanced melanoma (AM) patients and healthy donors (HD). Expression of costimulatory, inhibitory and maturation markers on (C) CD56<sup>bright</sup>CD16<sup>-</sup>, (D) CD56<sup>bright</sup>CD16<sup>+</sup> and (E) CD56<sup>bright</sup>CD16<sup>-</sup> NK cells from AM and HD. Median expression of granzyme and perforin by (F) CD56<sup>bright</sup>CD16<sup>-</sup>, (G) CD56<sup>dim</sup>CD16<sup>+</sup> and (H) CD56<sup>dim</sup>CD16<sup>-</sup> NK cells. Bars represent Mean  $\pm$  SEM. Two-way ANOVA with Sidak post-hoc test was used in C, D and E. Mann Whitney test was used to compare granzyme B and perforin in AM and HD in F, G, H. \* $p < 0.05$ , \*\* $p < 0.01$ , \*\*\* $p < 0.001$ , \*\*\*\* $p < 0.0001$ .  $n = 11$  AM and  $n = 15$  HD.
