# Supplementary material
Source: PubMed Central journal article supplement (PMC9401454)
Supplement: 10780432ccr210851-sup-261875_2_supp_7159130_q81f92.pdf [file 10780432ccr210851-sup-261875_2_supp_7159130_q81f92.pdf]

# Supplementary Figure 4

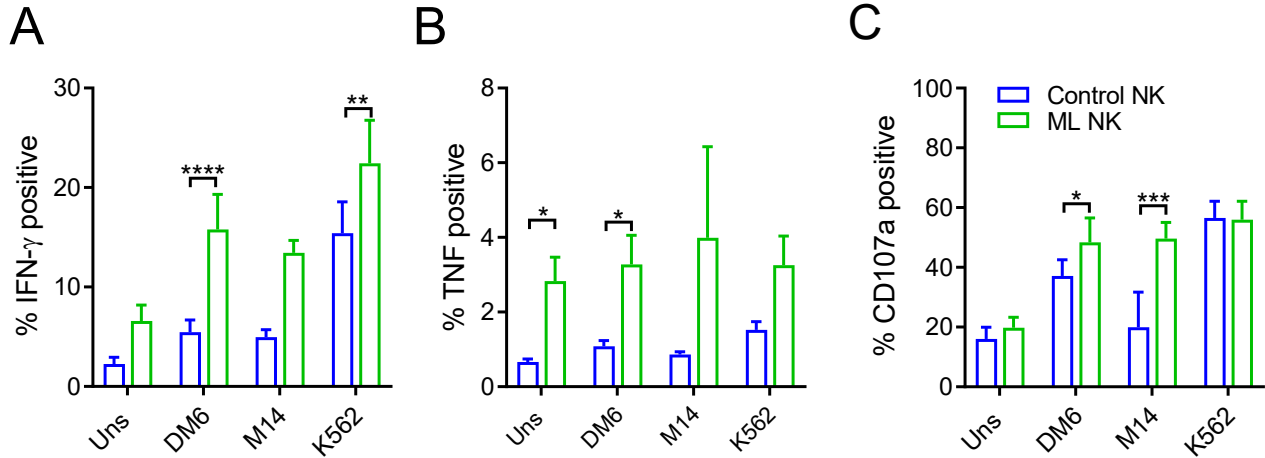

**Supplementary Fig. S4. Cytokine production and degranulation of purified NK cells from normal donors.** Purified NK from normal donors were activated with IL-12/IL-15/IL-18 (or IL-15 alone as control) for 16-18 hours as described in Figure 2A. Control and ML NK cells were stimulated with DM6, M14 and K562 in a 6-hours functional assay and the frequency of IFN- $\gamma$ , TNF, and degranulating (CD107a) cells was evaluated by flow cytometry. Bars represent Mean  $\pm$  SEM. Two-way ANOVA with Sidak post-hoc test \* $p < 0.05$ , \*\* $p < 0.01$ , \*\*\* $p < 0.001$ .  $n = 2-8$ .
