# Supplementary material
Source: PubMed Central journal article supplement (PMC9401454)
Supplement: 10780432ccr210851-sup-261875_2_supp_7159132_qd1f92.pdf [file 10780432ccr210851-sup-261875_2_supp_7159132_qd1f92.pdf]

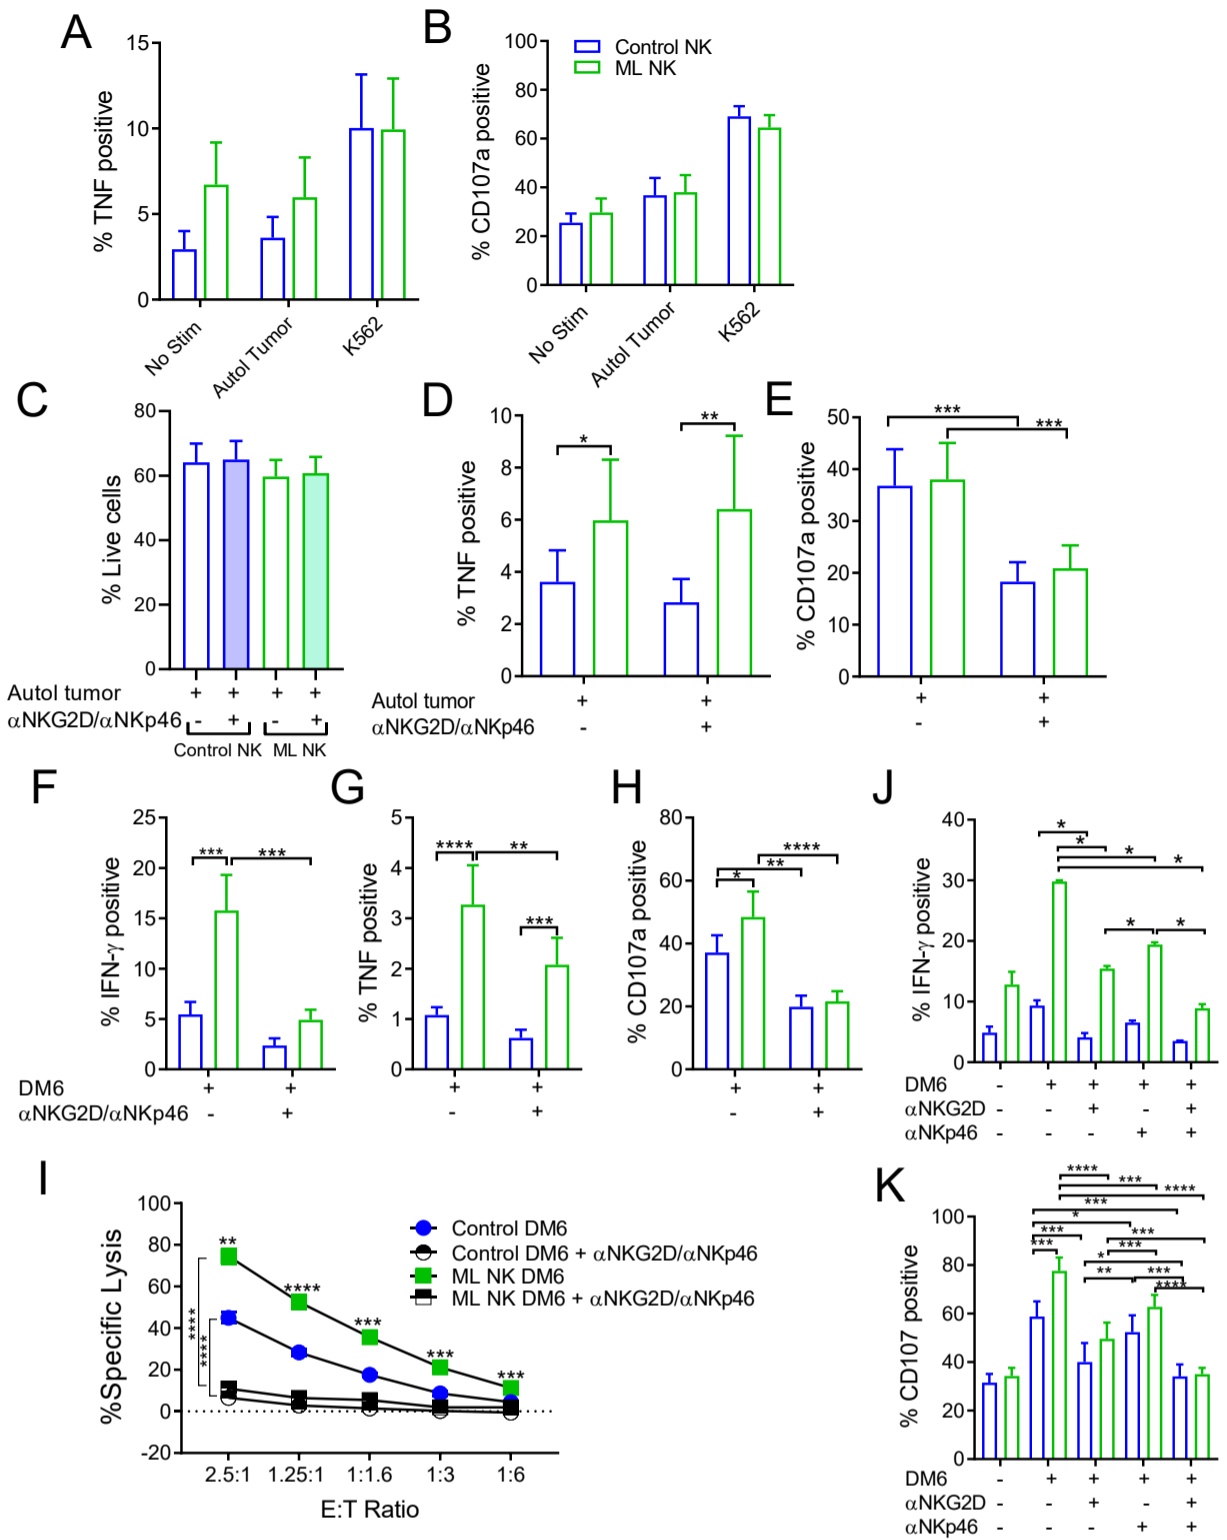

**Supplementary Fig. S6. Cytokine production and degranulation of control and ML NK cells from AM patients and normal donors and effect of antibody blockade.** (A) TNF production and (B) degranulation (CD107a+) of control and ML NK cells from AM in response to autologous melanoma targets. (C) Antibody blockade with  $\alpha$ NKG2D and  $\alpha$ NKp46 do not affect cell viability of control (blue) and ML NK (green) cells from AM patients. (D) TNF production and (E) degranulation of control (blue) and ML NK (green) cells from AM patients stimulated with autologous tumor in presence of  $\alpha$ NKG2D +  $\alpha$ NKp46 blocking antibodies. (F) IFN- $\gamma$ , (G) TNF, (H) degranulation and (I) cytotoxicity of control (blue) and ML NK (green) cells from HD stimulated with DM6 in presence of  $\alpha$ NKG2D/ $\alpha$ NKp46 blockade. (J) IFN- $\gamma$  and (K) degranulation (CD107a) of NK cells from HD in presence of single or combined  $\alpha$ NKG2D and  $\alpha$ NKp46 blockade. Figures A-E show PBMC-derived NK cells from AM patients (n=7) and F-K correspond to purified NK cells from HD (n=2-8). Bars represent mean  $\pm$  SEM. Two-way ANOVA with Turkey posthoc analysis. \* $p$ <0.05, \*\* $p$ <0.01, \*\*\* $p$ <0.001, \*\*\*\* $p$ <0.0001.
