# Supplementary material
Source: PubMed Central journal article supplement (PMC9401454)
Supplement: 10780432ccr210851-sup-261875_2_supp_7159133_qx1f92.pdf [file 10780432ccr210851-sup-261875_2_supp_7159133_qx1f92.pdf]

A

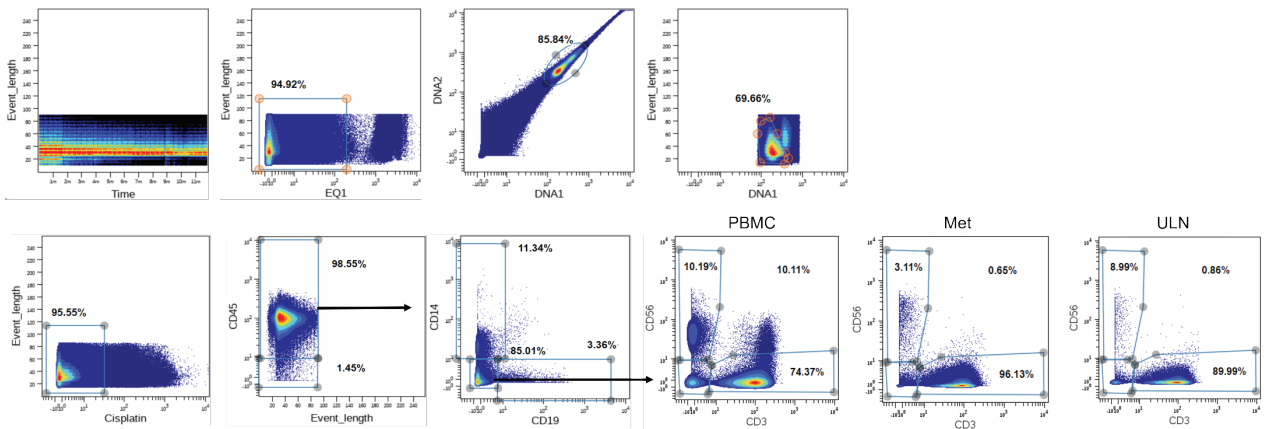

B

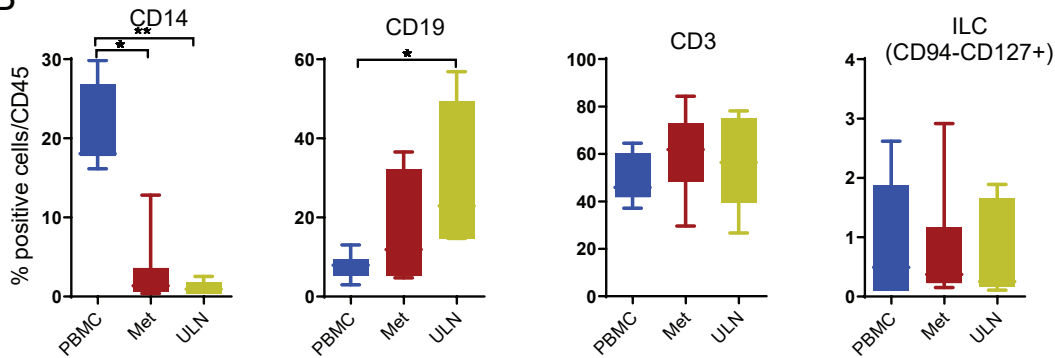

C

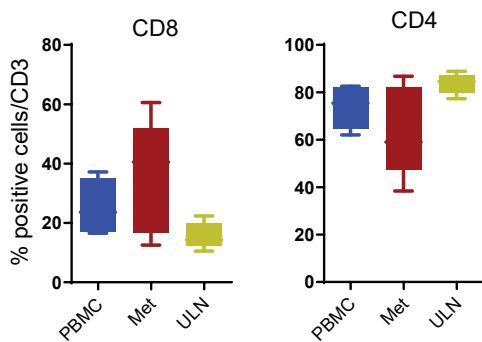

D

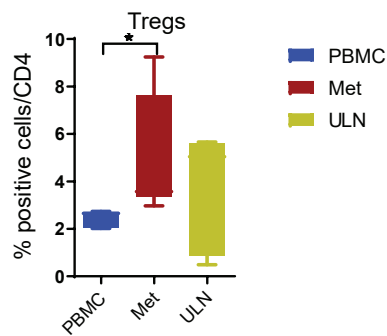

**Supplementary Fig. S1. Mass cytometry analysis and main immune cell subsets in PBMC, Met and ULN from AM patient samples.** (A) Gating strategy used to evaluate NK cells from PBMC, Met and ULN by Mass cytometry. (B) Percent of CD14<sup>+</sup>, CD19<sup>+</sup>, CD3<sup>+</sup> T cells and ILC within CD45<sup>+</sup> cells from PBMC, MLN and ULN is shown. (C) Percent of CD4<sup>+</sup> and CD8<sup>+</sup> T cells within the CD3<sup>+</sup> gate. (D) Percent of regulatory T cells CD4<sup>+</sup>CD25<sup>+</sup>CD127<sup>-</sup> within CD4<sup>+</sup> T cells. ILC3 cells were identified as CD45<sup>+</sup>CD14<sup>-</sup>CD19<sup>-</sup>CD3<sup>-</sup>CD127<sup>+</sup>CD16<sup>-</sup>. Bars represent Min and Max. Two-way ANOVA Test, Mixed effects Model with Turkey post-hoc test. \* $p < 0.05$ , \*\* $p < 0.01$ .  $n = 11$  PBMC,  $n = 11$  Met,  $n = 7$  ULN.
